# Supplementary material for: miR-199a-3p targets stemness-related and mitogenic signaling pathways to suppress the expansion and tumorigenic capabilities of prostate cancer stem cells
Source: PubMed Central journal article supplement (PMC5302940; doi:10.18632/oncotarget.10652), 2016-07-18
Supplement: oncotarget-07-56628-s001.pdf [file oncotarget-07-56628-s001.pdf]

# miR-199a-3p targets stemness-related and mitogenic signaling pathways to suppress the expansion and tumorigenic capabilities of prostate cancer stem cells

## SUPPLEMENTARY FIGURES AND TABLES

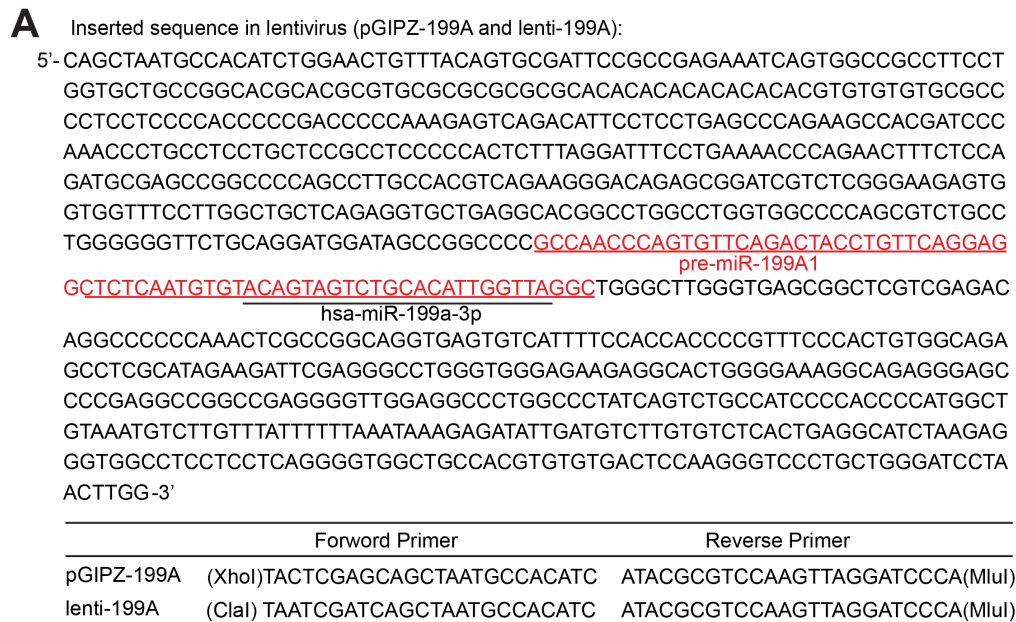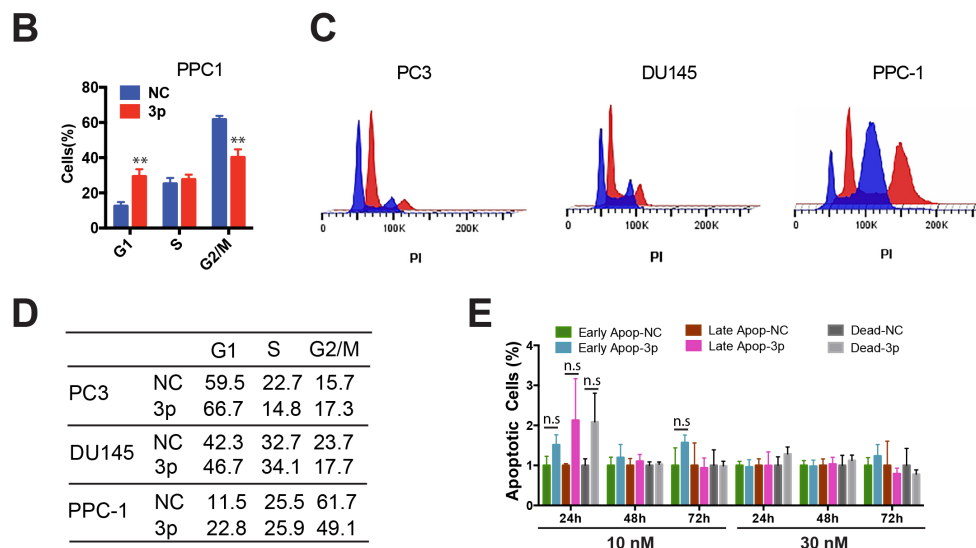

**Supplementary Figure 1: miR-199a-3p genomic loci and its effect on apoptosis in PCa cells.** **A.** The pre-miR-199A1 sequence inserted in either the pGIPZ-199A or lenti-199A lentiviral vectors established in our lab. The PCR primers that harbor the cloning restriction sites are indicated below. **B-D.** miR-199a-3p effects on cell-cycle profiles in the 3 PCa cell types. (B) DNA content analysis in miR-199a-3p or NC transfected PPC-1 cells. Bars represent the average % of cells in each cell-cycle phase (n=3 independent experiments). (C) Representative flow histograms showing the effects of miR-199a-3p on cell-cycle profiles in the 3 PCa cell types. (D) Table summarizing the mean % of cells in different cell-cycle phases in NC and miR-199a-3p transfected cells. **E.** DU145 cells transfected with miR-199a-3p or NC (30 nM) at different concentrations were harvested at 24-72 h and used in FITC-Annexin V and PI analysis. Early apoptosis: Annexin V positive/PI negative; Late apoptosis: Annexin V positive/PI positive; Dead (late necrotic) cells: PI positive only. n.s., not statistically significant (n=3 independent experiments). All bars and data points represent the mean  $\pm$  S.D.; \*\*P<0.01.

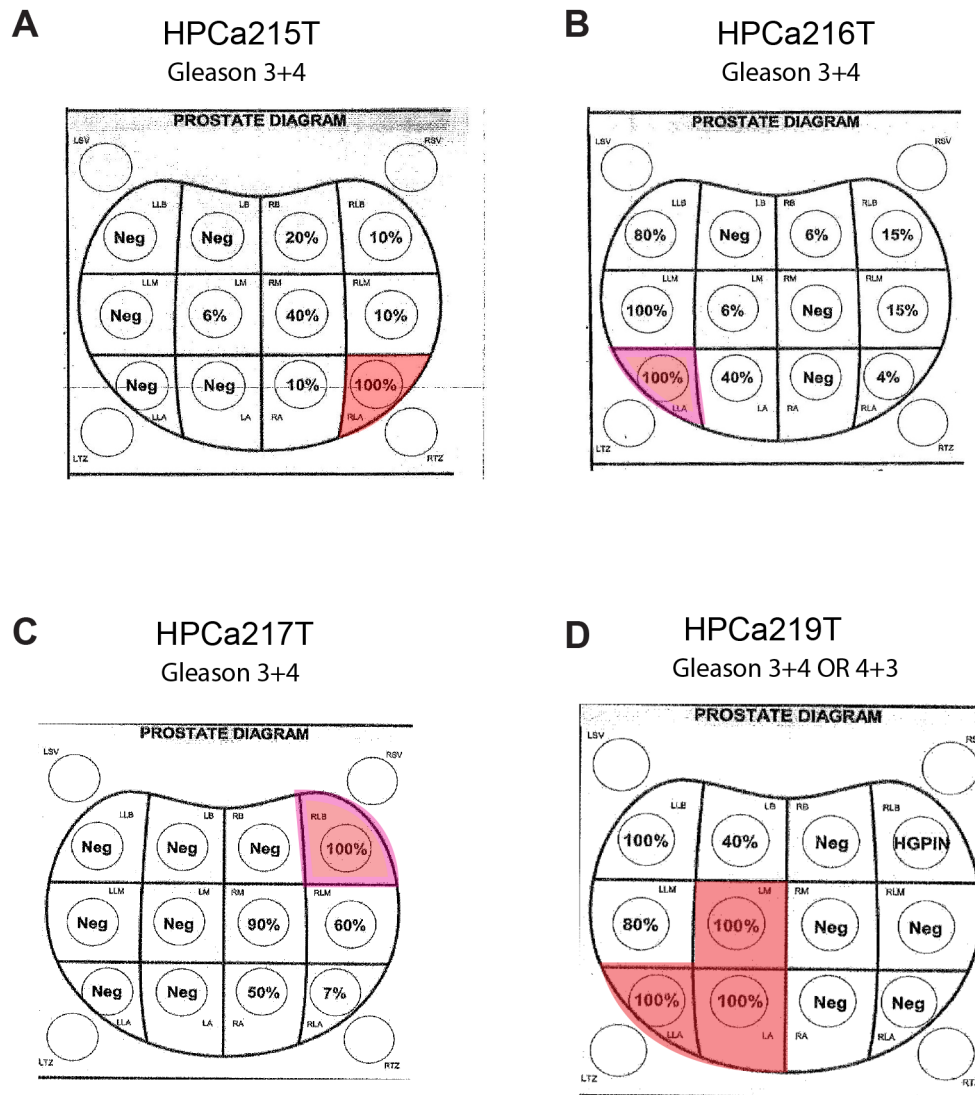

**Supplementary Figure 2. Biopsy reports of HPCa samples and transfection efficiency in HPCa cells. A-D.** Biopsy reports of HPCa215, HPCa216, HPCa217 and HPCa219 patient tumor samples. Red areas indicate the areas with ~100% tumor involvement used in present study.



Supplementary Table 1: Antibodies used in the current study

| Antibody       | Source | Type       | Catalog# | Company        | Remarks                          | Usage |
|----------------|--------|------------|----------|----------------|----------------------------------|-------|
| AKT            | Rabbit | Monoclonal | 4691     | Cell Signaling | Pan-AKT antibody                 | WB    |
| CD44           | Mouse  | Monoclonal | 555478   | BD Pharmingen  | Clone G44-26; FITC-conjugated    | FACS  |
| CD44           | Mouse  | Monoclonal | 555479   | BD Pharmingen  | Clone G44-26; PE-conjugated      | FACS  |
| CD44           | Mouse  | Monoclonal | 550329   | BD Pharmingen  | Clone G44-26; recognizes 80-95KD | IHC   |
| CD44           | Rabbit | Monoclonal | ab51037  | abcam          | Clone EPR1013Y                   | WB    |
| Cyclin D1      | Rabbit | Monoclonal | ab134175 | abcam          | Clone EPR2241                    | WB    |
| EGFR           | Rabbit | Monoclonal | 4267     | Cell Signaling |                                  | WB    |
| IgG2a          | Mouse  | Monoclonal | IC003A   | R&D System     | Clone 20102, APC-conjugated      |       |
| IgG2b          | Mouse  | Monoclonal | 555742   | BD Pharmingen  | Isotype control, FITC conjugated | FACS  |
| IgG2b          | Mouse  | Monoclonal | 555743   | BD Pharmingen  | Isotype control, PE conjugated   | FACS  |
| Ki-67          | Mouse  | Monoclonal | M7240    | Dako           | Clone M1B-1                      | IHC   |
| Lamin A        | Rabbit | Polyclonal | 2035     | Cell Signaling |                                  | IHC   |
| mTOR           | Rabbit | Monoclonal | 5536     | Cell Signaling |                                  | WB    |
| MYC            | Rabbit | Monoclonal | ab32072  | abcam          | Clone Y69                        | WB    |
| phospho-Akt    | Rabbit | Monoclonal | 4060     | Cell Signaling | Recognizes Ser473                | WB    |
| TROP-2         | Mouse  | Monoclonal | FAB650A  | R&D System     | Clone 77220, APC-conjugated      | FACS  |
| $\beta$ -actin | Mouse  | Monoclonal | A1978    | Sigma-Aldrich  | Clone AC-15                      | WB    |

Supplementary Table 2: Primers and inserted sequences used for luciferase-reporter plasmids

|                                       |                                                                                                                                                                                                                                                                                                                                                                                                                                                                                                                                                                                                                                                                                                                                                                                                                                                                                                                                                                                                                                                                                                                                                                                                                                                                                                                                                                                                                                                                                                                                                                                                                                         |
|---------------------------------------|-----------------------------------------------------------------------------------------------------------------------------------------------------------------------------------------------------------------------------------------------------------------------------------------------------------------------------------------------------------------------------------------------------------------------------------------------------------------------------------------------------------------------------------------------------------------------------------------------------------------------------------------------------------------------------------------------------------------------------------------------------------------------------------------------------------------------------------------------------------------------------------------------------------------------------------------------------------------------------------------------------------------------------------------------------------------------------------------------------------------------------------------------------------------------------------------------------------------------------------------------------------------------------------------------------------------------------------------------------------------------------------------------------------------------------------------------------------------------------------------------------------------------------------------------------------------------------------------------------------------------------------------|
| <b>CD44 3'</b><br><b>UTR-WT</b>       | Forward Primer: AGAGCTCCACCTACACCATTATCTTG<br>Reverse Primer: TAAGCTTGGAAGTCTTCAGGAGACAC                                                                                                                                                                                                                                                                                                                                                                                                                                                                                                                                                                                                                                                                                                                                                                                                                                                                                                                                                                                                                                                                                                                                                                                                                                                                                                                                                                                                                                                                                                                                                |
| <b>CD44 3'</b><br><b>UTR-MUT</b>      | Forward Primer: CTTAACAGATGCAATGTG <i>CctgTc</i> ATTGTTTCATTGCGAATC<br>Reverse Primer: GATTCGCAATGAAACAAT <i>gAcAgGC</i> CACATTGCATCTGTAAAG<br>TAATCTGTTATGTACTAGTGTCTGTTTGT<br>TATTGTTTTGTTAATTACACCATAATGCTAATT<br>TAAAGAGACTCCAAATCTCAATGAAGCCA<br>GCTCACAG <i>TGCTGT</i> GTGCCCGGTCACCTAGC<br>AAGCTGCCGAACCAAAAGAATTTGCACCCCGCTGCGGGCCCCACGTG<br>GTTGGGGCCCTGCCCTGGCAGGGTCATCCTGTGCTCGG<br>TAATCTGTTATGTACTAGTGTCTGTTTGTATTG<br>TTTTGTTAATTACACCATAATGCTAATT<br>AAAGAGACTCCAAATCTCAATGAAGCCAGCTC<br>ACAG <i>TACGCT</i> GTGCCCGGTCACCT<br>AGCAAGCTGCCGAACCAAAAGAATTT<br>GCACCCCGCTGCGGGCCCCACGTGGTTGGGGC<br>CCTGCCCTGGCAGGGTCATCCTGTGCTCGG<br>ACCTCAGACCGATTAAACGCAAATCTCTGGGGCTGAAACCCAAGCATTTCGTAG<br>TTTTTAAAGCTCCTGAGGTCATTCCAATGTGCGGCCA<br>AAGTTGAGAA <i>CTACTG</i> GCCTAGGG<br>ATTAGCCACAAGGACATGGACTTGGAGGCAAATCTGCAGGTGTATGTG<br>ATTCTCAGGCCTAGAGAGCTAAGACACAAAGACCTCCACATCTG<br>ACCTCAGACCGATTAAACGCAAATCTCTGGGGCTGAAACCCAAGCATT<br>CGTAGTTTTTAAAGCTCCTGAGGTCATTCCAATGTGCGGCCAAA<br>GTTGAGAA <i>ATCCCA</i> GCCTA<br>GGGATTAGCCACAAGGACATGGACTTGGAGGCA<br>AATTCTGCAGGTGTATGTGATTCTCAGGCC<br>TAGAGAGCTAAGACACAAAGACCTCCACATCTG<br>TGCTCCATGAGGAGACACCGCCCACCACCAGC<br>AGCGACTCTGAGGAGGAACAAGAAGATGAGGAAG<br>AAATCGATGTTGTTTCTGTGGAAAAGAGGCAGGCT <i>TCCTGG</i> CAAAAGGTCAG<br>AGTCTGGATCACCTTCTGCTGGAGGCCACAGCAAACCTCCTCACAGCCCCT<br>GGTCTCAAGAGGTGCCACGTCTCCACACATCAGCACA<br>TGCTCCATGAGGAGACACCGCCCACCAC<br>CAGCAGCGACTCTGAGGAGGAACAAGAAGATGA<br>GGAAGAAATCGATGTTGTTTCTGTGGAAAAGAGGC<br>AGGC <i>GCTCTG</i> CAAAAGGTCAG<br>AGTCTGGATCACCTTCTGCTGGAGGCCACAGC<br>AAACCTCCTCACAGCCCCTGGT<br>CCTCAAGAGGTGCCACGTCTCCACACATCAGCACA |
| <b>cyclin D1 3'</b><br><b>UTR-WT</b>  |                                                                                                                                                                                                                                                                                                                                                                                                                                                                                                                                                                                                                                                                                                                                                                                                                                                                                                                                                                                                                                                                                                                                                                                                                                                                                                                                                                                                                                                                                                                                                                                                                                         |
| <b>cyclin D1 3'</b><br><b>UTR-MUT</b> |                                                                                                                                                                                                                                                                                                                                                                                                                                                                                                                                                                                                                                                                                                                                                                                                                                                                                                                                                                                                                                                                                                                                                                                                                                                                                                                                                                                                                                                                                                                                                                                                                                         |
| <b>EGFR 3'</b><br><b>UTR-WT</b>       |                                                                                                                                                                                                                                                                                                                                                                                                                                                                                                                                                                                                                                                                                                                                                                                                                                                                                                                                                                                                                                                                                                                                                                                                                                                                                                                                                                                                                                                                                                                                                                                                                                         |
| <b>EGFR 3'</b><br><b>UTR-MUT</b>      |                                                                                                                                                                                                                                                                                                                                                                                                                                                                                                                                                                                                                                                                                                                                                                                                                                                                                                                                                                                                                                                                                                                                                                                                                                                                                                                                                                                                                                                                                                                                                                                                                                         |
| <b>MYC 3'</b><br><b>UTR-WT</b>        |                                                                                                                                                                                                                                                                                                                                                                                                                                                                                                                                                                                                                                                                                                                                                                                                                                                                                                                                                                                                                                                                                                                                                                                                                                                                                                                                                                                                                                                                                                                                                                                                                                         |
| <b>MYC 3'</b><br><b>UTR-MUT</b>       |                                                                                                                                                                                                                                                                                                                                                                                                                                                                                                                                                                                                                                                                                                                                                                                                                                                                                                                                                                                                                                                                                                                                                                                                                                                                                                                                                                                                                                                                                                                                                                                                                                         |

Note: The seed sequence and mutant region were highlighted in red.
